# Supplementary material for: Unravelling the Intrinsic Functional Organization of the Human Striatum: A Parcellation and Connectivity Study Based on Resting-State fMRI
Source: PubMed Central journal article supplement (PMC4159235; doi:10.1371/journal.pone.0106768), 2014-09-09
Supplement: pone.0106768.s001.pdf [file pone.0106768.s001.pdf]

## A. Caudate

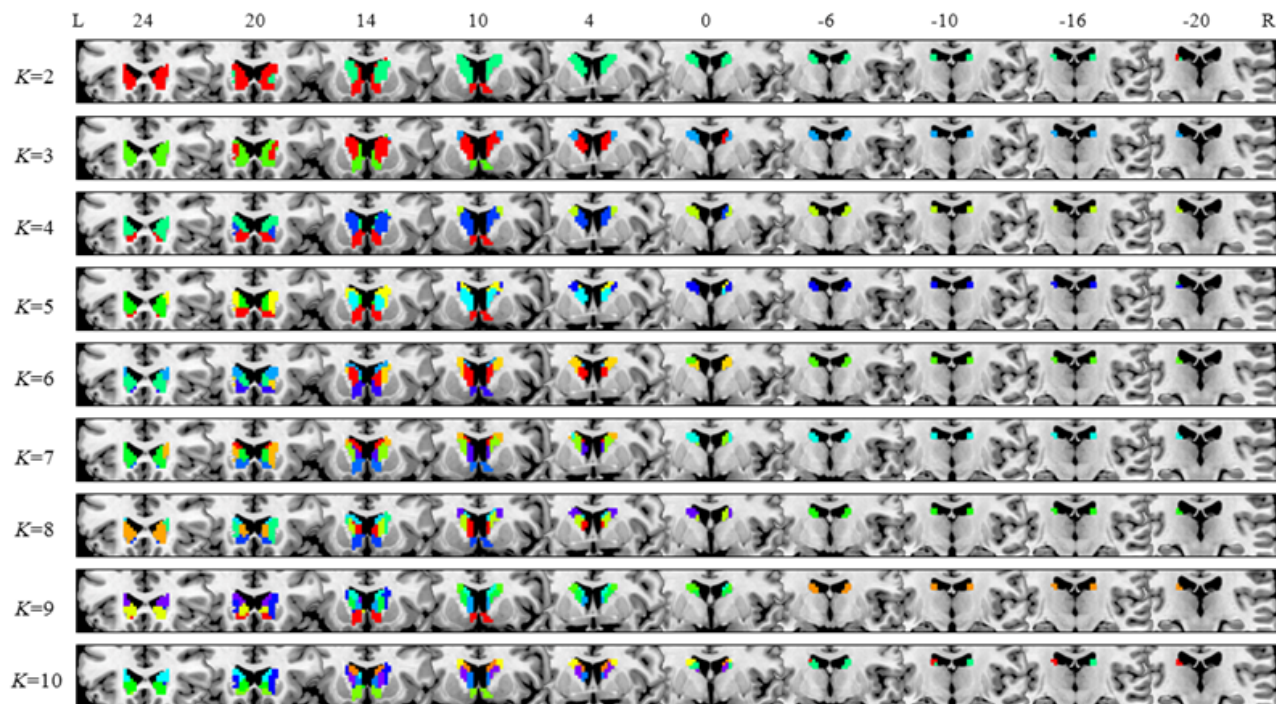

## B. Putamen

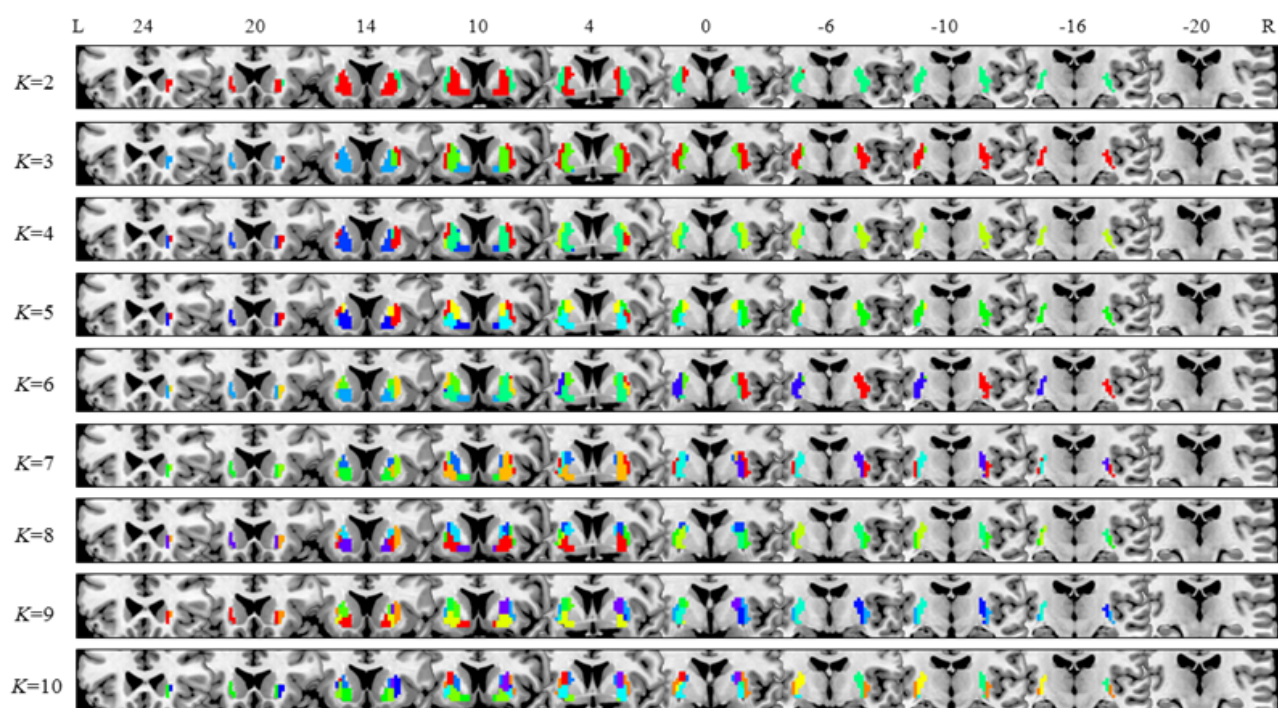

Figure S1. Coronal view showing functional connectivity-based parcellation of the caudate (A) and putamen (B) for cluster solutions with different  $K$  (2–10). With an increase in  $K$ , the functional subdivisions of the caudate and putamen were much more detailed and segmented along the ventro-dorsal, anterior-posterior, or medio-lateral axis.
