# Supplementary material for: Unravelling the Intrinsic Functional Organization of the Human Striatum: A Parcellation and Connectivity Study Based on Resting-State fMRI
Source: PubMed Central journal article supplement (PMC4159235; doi:10.1371/journal.pone.0106768), 2014-09-09
Supplement: pone.0106768.s008.pdf [file pone.0106768.s008.pdf]

Table S1. Peak coordinates of connectivity maps with caudate subregions

| Regions                                                 | Peak (mm)<br>x y z | t-value | z-value | R ANC                                                   | 45 -60 36   | 5.28  | 4.75 | L IPC                                                   | -36 -54 54  | 5.13  | 4.64 |
|---------------------------------------------------------|--------------------|---------|---------|---------------------------------------------------------|-------------|-------|------|---------------------------------------------------------|-------------|-------|------|
|                                                         |                    |         |         | R MFC                                                   | 42 15 54    | 4.90  | 4.46 | R Precuneus                                             | 24 -48 30   | 4.93  | 4.49 |
| <b>K=1, Positive connectivity map</b>                   |                    |         |         | <b>K=3, Negative connectivity map of cluster 2 seed</b> |             |       |      |                                                         |             |       |      |
| R Caud/R OLF                                            | 9 18 3             | 36.17   | Inf     | L Caud                                                  | -9 21 -3    | 9.22  | 7.21 | R SFC                                                   | 27 66 -9    | 4.29  | 3.98 |
| L Cerebellum                                            | -30 -78 -36        | 5.16    | 4.66    | L Caud                                                  | -18 3 27    | 8.13  | 6.61 | <b>K=9, Positive connectivity map of cluster 5 seed</b> |             |       |      |
| L SFC                                                   | -27 63 6           | 5.05    | 4.57    | R Caud                                                  | 18 -15 21   | 6.30  | 5.48 | R Caud/R AMY                                            | 12 3 12     | 30.67 | Inf  |
| R Cerebellum                                            | 30 -78 -36         | 4.78    | 4.37    | R ParaCL                                                | 3 -45 72    | 5.83  | 5.15 | L IFC                                                   | -51 21 12   | 7.83  | 6.44 |
| R Cerebellum                                            | 6 -81 -18          | 4.04    | 3.77    | R SMA                                                   | 9 -3 78     | 4.68  | 4.29 | R IOFC                                                  | 48 21 -15   | 7.59  | 6.30 |
| <b>K=1, Negative connectivity map</b>                   |                    |         |         | L CALC                                                  | 6 -96 -15   | 4.29  | 3.98 | L medSFC                                                | 0 39 45     | 7.44  | 6.21 |
| R Precuneus                                             | 3 -51 72           | 6.13    | 5.36    | <b>K=3, Positive connectivity map of cluster 3 seed</b> |             |       |      |                                                         |             |       |      |
| L THAL                                                  | -15 -9 -3          | 4.38    | 4.05    | L Caud/R Caud                                           | -15 -3 21   | 41.00 | Inf  | L MTC                                                   | -66 -33 -9  | 5.77  | 5.11 |
| R SMC/R IPC                                             | 57 -39 39          | 4.36    | 4.03    | <b>K=3, Negative connectivity map of cluster 3 seed</b> |             |       |      |                                                         |             |       |      |
| <b>K=2, Positive connectivity map of cluster 1 seed</b> |                    |         |         | L Caud/R ACC                                            | -9 12 6     | 6.69  | 5.74 | R Cerebellum                                            | 15 -81 -27  | 5.62  | 5.00 |
| L Caud/L MOFC                                           | -9 18 0            | 42.46   | Inf     | L STC/L INS                                             | -45 -21 6   | 6.09  | 5.33 | L Cerebellum                                            | -15 -81 -33 | 5.46  | 4.88 |
| L Cunues                                                | 3 -84 42           | 4.81    | 4.40    | R INS                                                   | 36 -18 21   | 6.08  | 5.33 | R MTC                                                   | 57 -39 -3   | 5.41  | 4.85 |
| L MOC                                                   | -45 -87 -9         | 4.63    | 4.25    | L Precuneus/L MCC                                       | -9 -42 3    | 5.87  | 5.18 | L SMC                                                   | -57 -51 30  | 4.91  | 4.47 |
| <b>K=2, Negative connectivity map of cluster 1 seed</b> |                    |         |         | L IOC                                                   | -36 -81 -9  | 5.41  | 4.85 | R ANC                                                   | 51 -51 30   | 4.68  | 4.30 |
| L Caud/L IOFC                                           | -15 3 18           | 10.24   | 7.70    | R THAL                                                  | 6 -12 -3    | 5.22  | 4.71 | <b>K=9, Negative connectivity map of cluster 5 seed</b> |             |       |      |
| R Caud/R THAL                                           | 15 0 18            | 6.58    | 5.66    | R medSFC/L ACC                                          | 15 48 3     | 5.16  | 4.66 | R ACC/L Caud                                            | 6 12 18     | 11.25 | Inf  |
| L SMC/L IPC                                             | -57 -57 24         | 6.04    | 5.30    | R IOFC                                                  | 33 -87 -6   | 5.08  | 4.60 | R INS                                                   | 39 -9 21    | 5.88  | 5.19 |
| R MFC/R IFC                                             | 39 9 51            | 5.82    | 5.14    | L MTC                                                   | -54 -6 -27  | 5.00  | 4.54 | L INS                                                   | -42 -3 -6   | 4.80  | 4.38 |
| R SMC/R IPC                                             | 60 -48 27          | 5.50    | 4.91    | L SFC                                                   | -15 63 36   | 4.97  | 4.52 | L SMC                                                   | -48 -24 24  | 4.39  | 4.06 |
| R medSFC                                                | 12 36 51           | 5.48    | 4.90    | R SOC                                                   | 18 -93 36   | 4.46  | 4.12 | <b>K=9, Positive connectivity map of cluster 6 seed</b> |             |       |      |
| R IOFC                                                  | 42 36 -18          | 5.45    | 4.87    | R CALC                                                  | 18 -48 6    | 4.42  | 4.09 | L Caud                                                  | -18 6 21    | 53.45 | Inf  |
| L MFC                                                   | -42 12 45          | 5.30    | 4.77    | L PreC                                                  | -36 -27 63  | 4.36  | 4.04 | R Caud                                                  | 18 6 24     | 26.52 | Inf  |
| R MTC                                                   | 63 -24 -12         | 5.10    | 4.62    | L ITC                                                   | -66 -24 -18 | 4.35  | 4.03 | <b>K=9, Negative connectivity map of cluster 6 seed</b> |             |       |      |
| R HIPPI                                                 | 9 -15 -24          | 5.00    | 4.54    | L STC/L MTC                                             | -45 -39 9   | 4.32  | 4.01 | R Caud                                                  | 12 9 12     | 9.88  | 7.53 |
| L MTC                                                   | -63 -24 -15        | 4.82    | 4.40    | <b>K=9, Positive connectivity map of cluster 7 seed</b> |             |       |      |                                                         |             |       |      |
| <b>K=2, Positive connectivity map of cluster 2 seed</b> |                    |         |         | R Caud/L Caud                                           | 12 21 9     | 29.86 | Inf  | R PostC/R Precuneus                                     | 24 -45 39   | 4.86  | 4.43 |
| L Caud                                                  | -12 6 12           | 34.51   | Inf     | L IOFC                                                  | -36 -84 -9  | 4.28  | 3.97 | R IFC                                                   | 42 24 24    | 4.74  | 4.34 |
| R Cerebellum                                            | 15 -78 -27         | 6.46    | 5.58    | <b>K=9, Negative connectivity map of cluster 7 seed</b> |             |       |      |                                                         |             |       |      |
| R MFC                                                   | 42 12 51           | 5.90    | 5.20    | <b>K=9, Negative connectivity map of cluster 1 seed</b> |             |       |      | R Caud/L MOFC                                           | -9 21 3     | 38.17 | Inf  |
| L ANC/L IPC                                             | -54 -66 39         | 4.97    | 4.52    | R Caud                                                  | 15 21 0     | 10.76 | Inf  | <b>K=9, Negative connectivity map of cluster 7 seed</b> |             |       |      |
| R MTC                                                   | 63 -15 -15         | 4.71    | 4.32    | L Caud                                                  | -15 21 0    | 8.13  | 6.62 | R Caud                                                  | 9 12 -6     | 10.49 | 7.81 |
| L Cerebellum                                            | 0 -51 -42          | 4.63    | 4.25    | R SFC                                                   | 21 60 15    | 4.81  | 4.39 | R MCC                                                   | 9 -12 30    | 5.97  | 5.25 |
| <b>K=2, Negative connectivity map of cluster 2 seed</b> |                    |         |         | <b>K=9, Positive connectivity map of cluster 2 seed</b> |             |       |      |                                                         |             |       |      |
| R Caud/R OLF                                            | 15 27 3            | 8.36    | 6.74    | R Caud/R MCC                                            | 18 18 12    | 40.87 | Inf  | R ANC/R Precuneus                                       | 30 -42 33   | 5.37  | 4.82 |
| R ParaCL                                                | 3 -45 72           | 6.59    | 5.67    | L Caud                                                  | -18 18 6    | 28.10 | Inf  | L PreC                                                  | -48 9 39    | 5.34  | 4.80 |
| L MOC                                                   | -33 -93 12         | 5.73    | 5.08    | L MFC                                                   | -21 54 30   | 6.08  | 5.33 | R Cerebellum                                            | 12 -87 -39  | 5.31  | 4.77 |
| R MOC                                                   | 36 -93 0           | 5.13    | 4.64    | R medSFC                                                | 12 57 18    | 4.89  | 4.46 | R INS                                                   | 45 -12 21   | 5.11  | 4.62 |
| R MFC                                                   | 33 -21 69          | 4.05    | 3.78    | <b>K=9, Positive connectivity map of cluster 8 seed</b> |             |       |      |                                                         |             |       |      |
| <b>K=3, Positive connectivity map of cluster 1 seed</b> |                    |         |         | <b>K=9, Negative connectivity map of cluster 2 seed</b> |             |       |      | <b>K=9, Positive connectivity map of cluster 8 seed</b> |             |       |      |
| L Caud/L MOFC                                           | -9 18 0            | 41.19   | Inf     | L Caud/L OLF                                            | -6 21 9     | 10.86 | Inf  | L Caud/R Caud                                           | -18 -12 21  | 38.18 | Inf  |
| L SFC                                                   | -12 69 9           | 4.15    | 3.87    | R Caud                                                  | 12 3 15     | 9.21  | 7.20 | R THAL/ THAL                                            | 3 -24 12    | 6.64  | 5.70 |
| <b>K=3, Negative connectivity map of cluster 1 seed</b> |                    |         |         | L Caud                                                  | -12 0 15    | 7.94  | 6.51 | <b>K=9, Negative connectivity map of cluster 8 seed</b> |             |       |      |
| R Caud                                                  | 12 9 12            | 10.38   | 7.77    | L MOC                                                   | -39 -93 -9  | 5.26  | 4.73 | R Caud                                                  | 21 9 24     | 6.61  | 5.69 |
| L Caud                                                  | -12 6 15           | 10.17   | 7.67    | R SOFC                                                  | 30 66 -6    | 4.32  | 4.00 | L Caud                                                  | -18 6 18    | 6.16  | 5.38 |
| L IOFC                                                  | -42 39 -9          | 7.30    | 6.12    | R MFC                                                   | 54 27 36    | 4.24  | 3.94 | <b>K=9, Positive connectivity map of cluster 9 seed</b> |             |       |      |
| L SMC                                                   | -57 -57 27         | 6.08    | 5.33    | <b>K=9, Positive connectivity map of cluster 3 seed</b> |             |       |      |                                                         |             |       |      |
| R SMC                                                   | 66 -51 27          | 6.02    | 5.28    | L Caud/R Caud                                           | -6 9 6      | 31.85 | Inf  | L Caud/R medOFC                                         | -9 15 -3    | 49.42 | Inf  |
| R HIPPI                                                 | 6 -15 -24          | 5.86    | 5.17    | R FFC                                                   | 21 -51 -12  | 4.35  | 4.03 | L Precuneus/L PCC                                       | -6 -63 30   | 5.94  | 5.23 |
| R MTC                                                   | 66 -27 -12         | 5.83    | 5.15    | L CALC                                                  | -6 -51 3    | 4.26  | 3.95 | L HIPPI                                                 | -24 -24 -18 | 4.37  | 4.04 |
| R MOFC                                                  | 36 42 -12          | 5.74    | 5.08    | <b>K=9, Negative connectivity map of cluster 3 seed</b> |             |       |      |                                                         |             |       |      |
| R MFC                                                   | 39 12 48           | 5.58    | 4.97    | L Caud                                                  | -15 6 15    | 9.52  | 7.36 | L Caud                                                  | -6 9 9      | 6.96  | 5.91 |
| L MTC                                                   | -57 6 -27          | 5.46    | 4.89    | R Caud                                                  | 15 9 15     | 9.17  | 7.18 | R IPC                                                   | 39 -30 60   | 4.90  | 4.47 |
| L MTC                                                   | -63 -24 -15        | 5.36    | 4.81    | R Caud                                                  | 12 18 -9    | 7.38  | 6.17 | R IFC                                                   | 57 18 9     | 4.76  | 4.36 |
| R medSFC                                                | 6 48 33            | 5.34    | 4.80    | R Caud                                                  | 18 27 9     | 7.13  | 6.02 | <b>K=9, Negative connectivity map of cluster 9 seed</b> |             |       |      |
| L MFC                                                   | -42 12 45          | 5.25    | 4.73    | L Cerebellum                                            | -18 -69 -24 | 4.83  | 4.41 |                                                         |             |       |      |
| R MCC                                                   | 21 -39 33          | 4.95    | 4.50    | L Precuneus                                             | 0 -60 66    | 4.68  | 4.29 |                                                         |             |       |      |
| R Cerebellum                                            | 18 -78 -30         | 4.59    | 4.22    | R Cerebellum                                            | 21 -93 -30  | 4.25  | 3.95 |                                                         |             |       |      |
| <b>K=3, Positive connectivity map of cluster 2 seed</b> |                    |         |         | <b>K=9, Positive connectivity map of cluster 4 seed</b> |             |       |      |                                                         |             |       |      |
| R Caud                                                  | 12 12 12           | 44.78   | Inf     | L Caud                                                  | -9 9 18     | 32.81 | Inf  |                                                         |             |       |      |
| R Cerebellum                                            | 30 -81 -36         | 8.26    | 6.69    | R INS                                                   | 45 -6 9     | 6.44  | 5.57 |                                                         |             |       |      |
| R MTC                                                   | 63 -27 -9          | 6.94    | 5.89    | L HIPPI                                                 | -24 -42 15  | 5.49  | 4.91 |                                                         |             |       |      |
| L Cerebellum                                            | -30 -78 -36        | 6.83    | 5.83    | L STC                                                   | -48 -3 -3   | 5.09  | 4.61 |                                                         |             |       |      |
| L ANC                                                   | -54 -66 39         | 6.77    | 5.79    | R Cerebellum                                            | 6 -21 -51   | 4.20  | 3.91 |                                                         |             |       |      |
| L Precuneus/L MCC                                       | -3 -54 33          | 5.60    | 4.99    | <b>K=9, Negative connectivity map of cluster 4 seed</b> |             |       |      |                                                         |             |       |      |
| R HIPPI                                                 | 12 -9 -24          | 5.38    | 4.83    | L Caud                                                  | -15 6 9     | 13.95 | Inf  |                                                         |             |       |      |
| L Cerebellum                                            | 0 -54 -42          | 5.31    | 4.77    | L IFC                                                   | -48 15 18   | 6.28  | 5.46 |                                                         |             |       |      |
|                                                         |                    |         |         | L MFC                                                   | -39 39 27   | 5.44  | 4.87 |                                                         |             |       |      |
|                                                         |                    |         |         | R IFC                                                   | 54 21 15    | 5.24  | 4.72 |                                                         |             |       |      |

Coordinates for peak voxels are presented in MNI space. Caud, caudate; OLF, olfactory cortex; SFC, superior frontal cortex; SMC, supramarginal cortex; IPC, inferior parietal cortex; MOFC, middle orbitofrontal cortex; MOC, middle occipital cortex; IOFC, inferior orbitofrontal cortex; MFC, middle frontal cortex; IFC, inferior frontal cortex; medSFC, medial superior frontal cortex; MTC, middle temporal cortex; HIPPI, hippocampus; MTC, middle temporal cortex; ANC, angular cortex; ParaCL, paracentral lobule; SFC, superior frontal cortex; MCC, middle cingulate cortex; SMA, supplementary motor area; CALC, calcarine cortex; ACC, anterior cingulate cortex; STC, superior temporal cortex; INS, insula; IOC, inferior occipital cortex; THAL, thalamus; SOC, superior occipital cortex; PreC, precentral cortex; ITC, inferior temporal cortex; SOFC, superior orbitofrontal cortex; FFC, fusiform face cortex; AMY, amygdala; PostC, postcentral cortex; PCC, posterior cingulate cortex; medOFC, medial orbitofrontal cortex.
