# Supplementary material for: Unravelling the Intrinsic Functional Organization of the Human Striatum: A Parcellation and Connectivity Study Based on Resting-State fMRI
Source: PubMed Central journal article supplement (PMC4159235; doi:10.1371/journal.pone.0106768), 2014-09-09
Supplement: pone.0106768.s009.pdf [file pone.0106768.s009.pdf]

Table S2. Peak coordinates of connectivity maps with putamen subregions

| Regions                                                 | Peak (mm)<br>x y z | t-value | z-value | L MCC/L SMA                                             | 0 -3 48    | 9.67  | 7.43 | K=6, Positive connectivity map of cluster 1 seed        |           |       |      |  |  |
|---------------------------------------------------------|--------------------|---------|---------|---------------------------------------------------------|------------|-------|------|---------------------------------------------------------|-----------|-------|------|--|--|
|                                                         |                    |         |         | L MFC                                                   | -30 42 30  | 4.35  | 4.03 | L Puta/L ACC                                            | -18 15 -6 | 48.52 | Inf  |  |  |
| <b>K=1, Positive connectivity map</b>                   |                    |         |         | <b>K=3, Negative connectivity map of cluster 3 seed</b> |            |       |      | R Puta/R INS                                            | 33 -6 3   | 6.11  | 5.34 |  |  |
| L Puta/R Puta                                           | -24 9 0            | 39.58   | Inf     | L Puta/L THAL                                           | -21 9 3    | 10.36 | 7.76 | R MFC                                                   | 30 45 36  | 5.50  | 4.91 |  |  |
| R PreC                                                  | 54 6 48            | 6.89    | 5.86    | R Puta                                                  | 21 6 6     | 9.87  | 7.53 | R INS                                                   | 42-15 21  | 5.33  | 4.79 |  |  |
| L PreC                                                  | -51 3 45           | 4.38    | 4.05    | L Cerebellum                                            | -18-84 -33 | 7.67  | 6.35 | R Cuneus                                                | 15-69 36  | 5.07  | 4.60 |  |  |
| L MFC                                                   | -30 45 24          | 4.19    | 3.9     | L IPC                                                   | -33-75 42  | 7.35  | 6.15 | L Precuneus                                             | -6-72 36  | 4.98  | 4.53 |  |  |
| <b>K=1, Negative connectivity map</b>                   |                    |         |         |                                                         |            |       |      | L Cerebellum                                            | -6-27-18  | 6.41  | 5.55 |  |  |
| L Precuneus                                             | -3-69 42           | 6.56    | 5.65    | L MFC                                                   | -42 12 54  | 5.93  | 5.22 | L STG/L INS                                             | -48-18 9  | 4.09  | 3.82 |  |  |
| R LC/L THAL                                             | 6-24-12            | 6.44    | 5.57    | L MCC/L SMA                                             | -12-45 33  | 5.88  | 5.19 | R SFC                                                   | 27 54 9   | 4.05  | 3.79 |  |  |
| R THAL                                                  | 9-15 6             | 6.27    | 5.46    | L MTC                                                   | -48-42 -6  | 5.41  | 4.85 | <b>K=6, Negative connectivity map of cluster 1 seed</b> |           |       |      |  |  |
| L MOC/L ANC                                             | -33-78 36          | 5.46    | 4.88    | L MOC/L ANC                                             | 39-81 36   | 5.17  | 4.67 | R Puta                                                  | 24 6 6    | 10.57 | Inf  |  |  |
| L MTC                                                   | -57-45-12          | 5.37    | 4.82    | R MTC                                                   | 69-36 -9   | 4.35  | 4.03 | L Puta                                                  | -24 6 3   | 8.24  | 6.68 |  |  |
| R ANC                                                   | 42-63 42           | 5.02    | 4.56    | <b>K=4, Positive connectivity map of cluster 1 seed</b> |            |       |      | <b>K=6, Positive connectivity map of cluster 2 seed</b> |           |       |      |  |  |
| R Cerebellum                                            | 0-21-36            | 4.54    | 4.18    | L Puta/L ACC                                            | -18 15 -3  | 46.65 | Inf  | R Puta                                                  | 27 9 -3   | 38.01 | Inf  |  |  |
| R MTC                                                   | 66-36-12           | 4.24    | 3.94    | R Cuneus                                                | 15-69 33   | 5.00  | 4.54 | L Puta                                                  | -24 6 -6  | 36.73 | Inf  |  |  |
| R MFC                                                   | 39 24 54           | 4.11    | 3.83    | R Puta/R INS                                            | 33 -6 0    | 5.72  | 5.07 | R IFC                                                   | 45 21 24  | 5.31  | 4.77 |  |  |
| <b>K=2, Positive connectivity map of cluster 1 seed</b> |                    |         |         |                                                         |            |       |      | R Rectus                                                | 3 45-24   | 4.48  | 4.13 |  |  |
| L Puta/R Puta                                           | -21 9 0            | 38.58   | Inf     | L Precuneus                                             | -6-72 36   | 5.33  | 4.79 | <b>K=6, Negative connectivity map of cluster 2 seed</b> |           |       |      |  |  |
| L SMA                                                   | 0 18 60            | 5.85    | 5.16    | R Cuneus                                                | 15-69 33   | 5.00  | 4.54 | R Puta/R INS                                            | 27 21 3   | 9.62  | 7.41 |  |  |
| L MFC/L ACC                                             | -27 48 18          | 5.79    | 5.12    | L INS                                                   | -36-15 18  | 4.67  | 4.28 | L Puta/L INS                                            | -15 18 -3 | 8.75  | 6.96 |  |  |
| R Cerebellum                                            | 24 -72 -36         | 5.61    | 4.99    | <b>K=4, Negative connectivity map of cluster 1 seed</b> |            |       |      | R Puta/R INS                                            | 33 -9 3   | 7.27  | 6.11 |  |  |
| R Cerebellum                                            | 36-63-27           | 5.31    | 4.77    | R Puta                                                  | 24 3 6     | 9.52  | 7.36 | L ACC                                                   | 3 36 21   | 5.24  | 4.72 |  |  |
| L PreC                                                  | -45 9 48           | 5.20    | 4.69    | L Puta                                                  | -24 0 6    | 7.07  | 5.98 | R MFC                                                   | 27 54 30  | 4.33  | 4.01 |  |  |
| L Cerebellum                                            | -39-69-27          | 5.16    | 4.66    | <b>K=4, Positive connectivity map of cluster 2 seed</b> |            |       |      | <b>K=6, Positive connectivity map of cluster 3 seed</b> |           |       |      |  |  |
| <b>K=2, Negative connectivity map of cluster 1 seed</b> |                    |         |         |                                                         |            |       |      | L Puta                                                  | -24 6 0   | 47.38 | Inf  |  |  |
| L Puta/L INS                                            | -33 -6 3           | 10.27   | 7.72    | R Puta                                                  | 24 6 6     | 31.40 | Inf  | R Puta                                                  | 21 9 9    | 21.11 | Inf  |  |  |
| R Puta                                                  | 33 -3 6            | 9.36    | 7.28    | L SMA                                                   | -3 18 66   | 6.38  | 5.53 | R Cerebellum                                            | 27-69-30  | 5.91  | 5.21 |  |  |
| R PostC                                                 | 42-24 63           | 4.25    | 3.95    | L IFC                                                   | -54 24 18  | 5.22  | 4.71 | L SMA                                                   | -3 21 60  | 5.74  | 5.09 |  |  |
| <b>K=2, Positive connectivity map of cluster 2 seed</b> |                    |         |         |                                                         |            |       |      | L MFC                                                   | -42 12 48 | 5.00  | 4.54 |  |  |
| R Puta/R INS                                            | 30 0 3             | 38.45   | Inf     | R Cerebellum                                            | 24-84-24   | 4.83  | 4.41 | <b>K=6, Negative connectivity map of cluster 3 seed</b> |           |       |      |  |  |
| L Puta/L STC                                            | -30 -3 3           | 36.58   | Inf     | L MTC                                                   | -51-42 -6  | 4.79  | 4.38 | R Puta                                                  | 21 12 -9  | 11.80 | Inf  |  |  |
| L SMA/R SMA                                             | -3 -6 66           | 8.66    | 6.91    | L ANC                                                   | -54-60 24  | 4.02  | 3.76 | L MCC                                                   | -12-18 42 | 5.42  | 4.85 |  |  |
| R PreC                                                  | 51 3 48            | 5.90    | 5.20    | <b>K=4, Negative connectivity map of cluster 2 seed</b> |            |       |      | L medOFC                                                | -12 45 -6 | 4.30  | 3.99 |  |  |
| L PreC                                                  | -42 -6 54          | 5.12    | 4.63    | R Puta                                                  | 33 -9 3    | 11.43 | Inf  | R MFC                                                   | 42 42 3   | 4.22  | 3.93 |  |  |
| L Cerebellum                                            | -6-60-15           | 4.42    | 4.09    | L INS                                                   | -33 -6 6   | 8.72  | 6.94 | <b>K=6, Positive connectivity map of cluster 4 seed</b> |           |       |      |  |  |
| <b>K=2, Negative connectivity map of cluster 2 seed</b> |                    |         |         |                                                         |            |       |      | R THAL                                                  | 9-21 6    | 6.06  | 5.31 |  |  |
| L Puta/L Caud                                           | -18 15 -6          | 10.83   | Inf     | L MFC                                                   | -42 48 24  | 4.95  | 4.50 | R SMC                                                   | 63-30 42  | 6.98  | 5.93 |  |  |
| R Caud                                                  | 18 18 -3           | 9.69    | 7.44    | R SMC                                                   | 48-42 39   | 4.49  | 4.14 | R MCC                                                   | 6 18 42   | 6.41  | 5.55 |  |  |
| L Precuneus                                             | -3-72 36           | 7.41    | 6.19    | <b>K=4, Positive connectivity map of cluster 3 seed</b> |            |       |      | L SMC                                                   | -63-30 24 | 5.98  | 5.26 |  |  |
| R Cerebellum                                            | 18-78-33           | 7.19    | 6.05    | R Puta                                                  | 27 15 3    | 46.32 | Inf  | L MFC                                                   | -42 48 27 | 5.88  | 5.19 |  |  |
| L Cerebellum                                            | -6-27-18           | 6.42    | 5.56    | L INS                                                   | -27 15 9   | 18.16 | Inf  | R MCC                                                   | 12-33 42  | 5.49  | 4.91 |  |  |
| L IPC                                                   | -30-75 45          | 6.22    | 5.42    | R SMA/R MCC                                             | 6 9 51     | 6.65  | 5.71 | R SFC                                                   | 24 0 57   | 5.35  | 4.81 |  |  |
| L ITC                                                   | -60-57-18          | 5.22    | 4.71    | R SMC                                                   | 66-30 42   | 6.45  | 5.58 | L MCC                                                   | -15-27 36 | 5.01  | 4.55 |  |  |
| L MFC                                                   | -36 9 63           | 4.96    | 4.51    | L MFC                                                   | -42 48 27  | 6.29  | 5.47 | L PreC                                                  | -36 -6 51 | 4.62  | 4.25 |  |  |
| L THAL                                                  | -3-18 3            | 4.64    | 4.26    | L SMC                                                   | -60-27 21  | 5.89  | 5.20 | R SPC                                                   | 45-42 57  | 4.50  | 4.15 |  |  |
| L Cerebellum                                            | -9-51-48           | 4.63    | 4.25    | L MCC                                                   | -15-27 33  | 5.13  | 4.64 | <b>K=6, Negative connectivity map of cluster 4 seed</b> |           |       |      |  |  |
| R MTC                                                   | 69-36 -9           | 4.40    | 4.07    | R MOC                                                   | 42-78 24   | 4.61  | 4.23 | R Puta                                                  | 27 3 -6   | 8.16  | 6.63 |  |  |
| L MTC                                                   | -60-36-12          | 4.27    | 3.96    | L Precuneus                                             | -36 -6 51  | 4.47  | 4.13 | L Puta                                                  | -21 6 0   | 7.71  | 6.37 |  |  |
| <b>K=3, Positive connectivity map of cluster 1 seed</b> |                    |         |         | <b>K=4, Negative connectivity map of cluster 3 seed</b> |            |       |      | L SFC/L medSFC                                          | -15 45 48 | 6.46  | 5.59 |  |  |
| L Puta/L THAL                                           | -18 15 -3          | 44.24   | Inf     | L Puta                                                  | -21 6 0    | 7.78  | 6.41 | L MCC                                                   | 0-45 33   | 5.63  | 5.01 |  |  |
| R MFC                                                   | 33 45 36           | 6.16    | 5.38    | L Rectus                                                | -3 60-18   | 6.81  | 5.81 | L ANC                                                   | -51-63 33 | 5.54  | 4.94 |  |  |
| R Cuneus                                                | 15-69 36           | 5.57    | 4.96    | L MCC                                                   | 0-45 33    | 6.49  | 5.60 | L MTC                                                   | -63-30 -9 | 5.26  | 4.73 |  |  |
| R Puta/R INS                                            | 36 -9 0            | 5.19    | 4.69    | R Puta                                                  | 27 -3 3    | 5.87  | 5.18 | R Cerebellum                                            | 27-84 -39 | 5.18  | 4.68 |  |  |
| L Precuneus                                             | -6-72 36           | 4.85    | 4.42    | L ANC                                                   | -51-63 33  | 5.67  | 5.04 | L MFC                                                   | -39 21 45 | 4.99  | 4.53 |  |  |
| L INS                                                   | -39-18 15          | 4.83    | 4.41    | R Cerebellum                                            | 27-87-42   | 5.31  | 4.77 | R SFC                                                   | 24 36 48  | 4.79  | 4.37 |  |  |
| R STC                                                   | 48-33 12           | 4.11    | 3.83    | R SFC                                                   | 21 36 51   | 5.27  | 4.74 | <b>K=6, Positive connectivity map of cluster 5 seed</b> |           |       |      |  |  |
| <b>K=3, Negative connectivity map of cluster 1 seed</b> |                    |         |         |                                                         |            |       |      | L Puta/L INS                                            | -30 -3 3  | 57.00 | Inf  |  |  |
| R Puta                                                  | 24 6 6             | 10.28   | 7.72    | L MTC                                                   | -63-30 -9  | 4.93  | 4.49 | L SMA/L MCC                                             | -3 -6 66  | 6.98  | 5.92 |  |  |
| L Puta                                                  | -24 3 9            | 9.75    | 7.47    | L SOFC                                                  | -12 27-24  | 4.30  | 3.99 | R INS                                                   | 48 6 -9   | 5.17  | 4.67 |  |  |
| L ANC                                                   | -48-63 42          | 4.17    | 3.88    | R ANC                                                   | 54-69 36   | 4.28  | 3.97 | L PreC                                                  | -42-12 51 | 5.08  | 4.60 |  |  |
| <b>K=3, Positive connectivity map of cluster 2 seed</b> |                    |         |         | <b>K=4, Positive connectivity map of cluster 4 seed</b> |            |       |      | <b>K=6, Negative connectivity map of cluster 5 seed</b> |           |       |      |  |  |
| L Puta                                                  | -24 6 0            | 47.98   | Inf     | R Puta/R INS                                            | 33-12 3    | 39.08 | Inf  | R Puta                                                  | 24 15 9   | 7.51  | 6.25 |  |  |
| R Puta                                                  | 24 9 3             | 33.00   | Inf     | L Puta/L INS                                            | -30 -3 3   | 31.05 | Inf  | L Cerebellum                                            | -30-75-27 | 4.71  | 4.32 |  |  |
| L SMA                                                   | -3 18 63           | 5.73    | 5.08    | L SMA                                                   | -6 -6 72   | 8.55  | 6.85 | <b>K=6, Positive connectivity map of cluster 6 seed</b> |           |       |      |  |  |
| L MFC                                                   | -42 6 51           | 5.05    | 4.58    | L PreC                                                  | -39-18 51  | 5.30  | 4.77 | R Puta/R INS                                            | 30 -3 0   | 47.44 | Inf  |  |  |
| L IFC                                                   | -45 18 18          | 4.79    | 4.38    | R PreC                                                  | 51 -6 48   | 5.02  | 4.56 | L INS                                                   | -27-24 12 | 5.82  | 5.15 |  |  |
| <b>K=3, Negative connectivity map of cluster 2 seed</b> |                    |         |         | <b>K=4, Negative connectivity map of cluster 4 seed</b> |            |       |      | L STC                                                   | -63 -6 3  | 5.78  | 5.12 |  |  |
| R Puta/L Puta                                           | 33 -9 3            | 13.68   | Inf     | R Puta                                                  | 24 15 6    | 9.10  | 7.14 | R PreC                                                  | 36-12 66  | 5.36  | 4.81 |  |  |
| L Puta                                                  | -33 -9 3           | 9.66    | 7.43    | L Puta/L THAL                                           | -21 9 6    | 8.65  | 6.90 | <b>K=6, Negative connectivity map of cluster 6 seed</b> |           |       |      |  |  |
| R THAL                                                  | 9-21 6             | 6.13    | 5.36    | R ANC                                                   | 39-81 36   | 6.34  | 5.51 | L Puta                                                  | -24 6 -6  | 6.95  | 5.90 |  |  |
| R MFC                                                   | 33 42 33           | 5.10    | 4.62    | L Cerebellum                                            | -18-84-30  | 6.11  | 5.35 | R Puta                                                  | 24 9 -6   | 5.64  | 5.02 |  |  |
| R INS                                                   | 57 3 3             | 4.91    | 4.47    | R Cerebellum                                            | 12-84-30   | 6.01  | 5.27 | L IFC                                                   | -48 27 27 | 5.47  | 4.89 |  |  |
| L Cuneus                                                | -18-63 24          | 4.79    | 4.38    | L MOC                                                   | -33-72 36  | 5.58  | 4.97 | R Cerebellum                                            | 6-81-27   | 5.22  | 4.70 |  |  |
| R SMC/R IPC                                             | 48-42 39           | 4.07    | 3.80    | L MFC                                                   | -33 9 63   | 5.32  | 4.78 | L MFC                                                   | -27 42 3  | 4.85  | 4.42 |  |  |
| <b>K=3, Positive connectivity map of cluster 3 seed</b> |                    |         |         |                                                         |            |       |      | L Precuneus                                             | -3-72 51  | 4.91  | 4.47 |  |  |
| R Puta/R INS                                            | 33-12 3            | 38.71   | Inf     | L ITC                                                   | -60-57-18  | 4.56  | 4.20 | L IPC                                                   | -27-75 48 | 4.57  | 4.20 |  |  |
| L Puta/L INS                                            | -30 -3 3           | 28.02   | Inf     | R IFC                                                   | 48 24 27   | 4.55  | 4.19 | L MFC                                                   | -30 15 63 | 4.41  | 4.08 |  |  |
|                                                         |                    |         |         | L SMC                                                   | -54-54 27  | 4.52  | 4.17 |                                                         |           |       |      |  |  |

Coordinates for peak voxels are presented in MNI space. Puta, putamen; PreC, precentral cortex; MFC, middle frontal cortex; MCC, middle cingulate cortex; LC, lingual cortex; THAL, thalamus; MOC, middle occipital cortex; ANC, angular cortex; MTC, middle temporal cortex; SMA, supplementary motor area; ACC, anterior cingulate cortex; INS, insula; PosC, postcentral cortex; STC, superior temporal cortex; IPC, inferior parietal cortex; ITC, inferior temporal cortex; IFC, inferior frontal cortex; SMC, supramarginal cortex; MCC, middle cingulate cortex; MOC, middle occipital cortex; SFC, superior frontal cortex; SOFC, superior orbitofrontal cortex; medOFC, medial orbitofrontal cortex; SPC, superior parietal cortex; medSFC, medial superior frontal cortex.
